# Supplementary material for: Integrating a genome‐wide association study with a large‐scale transcriptome analysis to predict genetic regions influencing the glycaemic index and texture in rice
Source: PubMed Central journal article supplement (PMC6575982; doi:10.1111/pbi.13051), 2019-01-24
Supplement: PBI-17-1261-s001.pdf [file PBI-17-1261-s001.pdf]

Figure S1

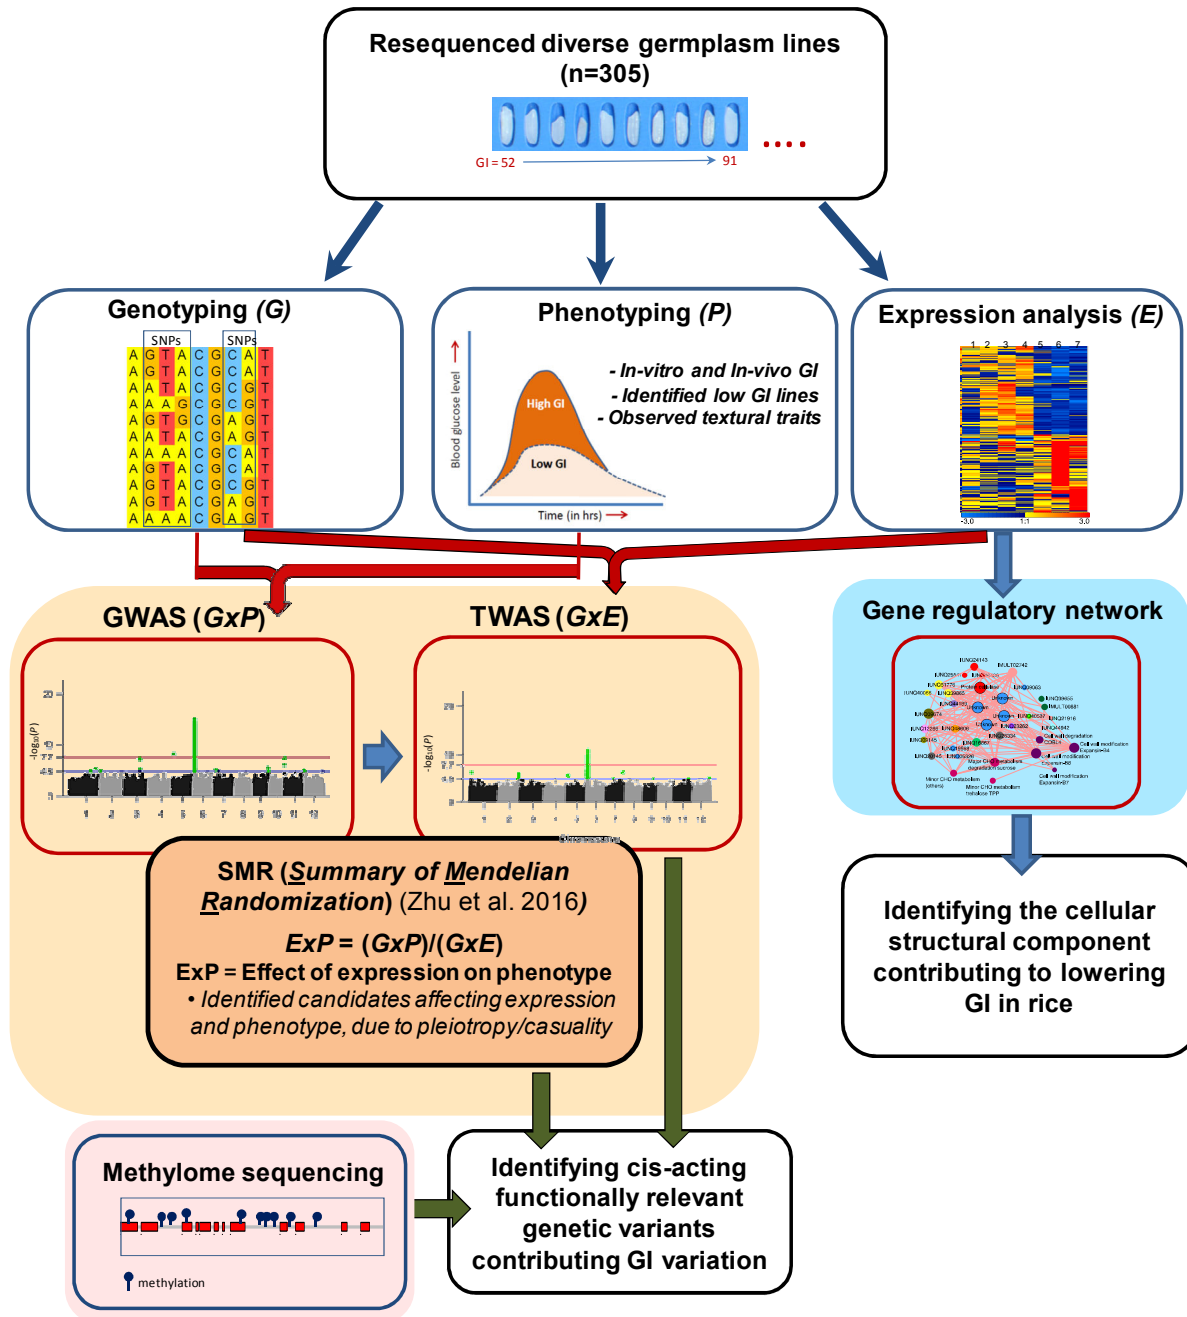

Figure S1: Schematic representation of the study conducted.

Figure S2

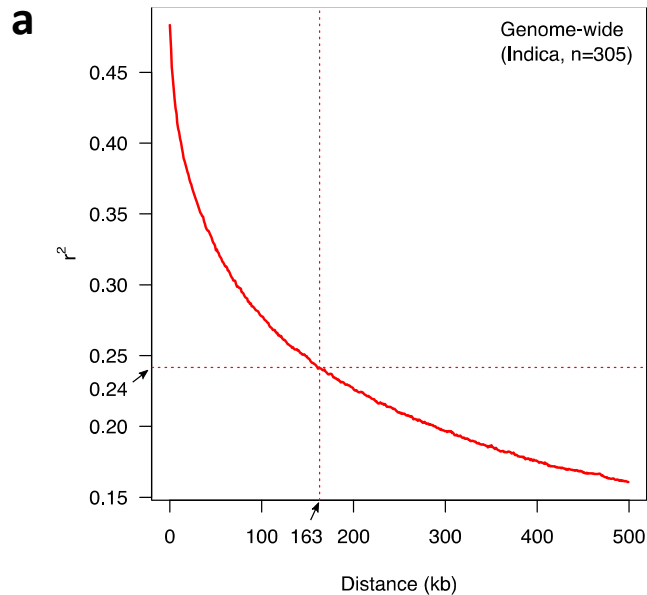

**Figure S2** Linkage disequilibrium (LD) decay. **(a)** Genome-wide average LD decay calculated using 307,903 approximately equally spaced markers systematically selected one marker per 500 base pairs for 305 individuals. The average  $r^2$  dropped to 0.24 that was half its maximum value at chromosomal distance 163 kb. **(b)** Long-range average LD decay calculated for the region where the association signal was found. The average  $r^2$  dropped to 0.16, which was half its maximum value for this specific region, at a chromosomal distance of 60 kb.

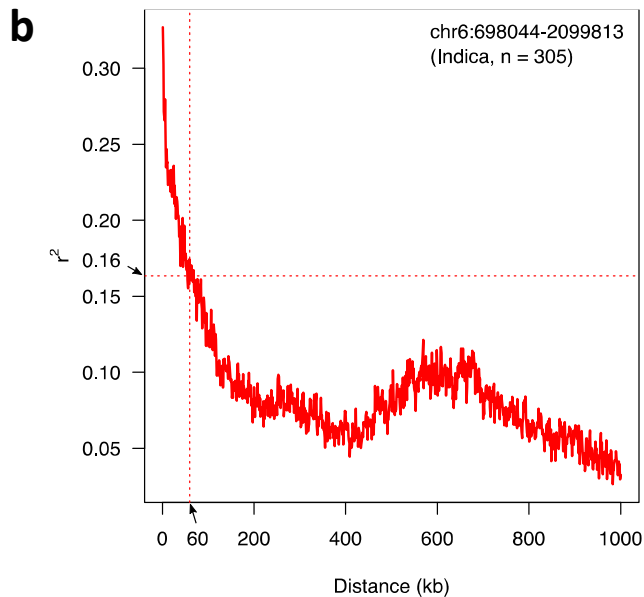

Figure S3

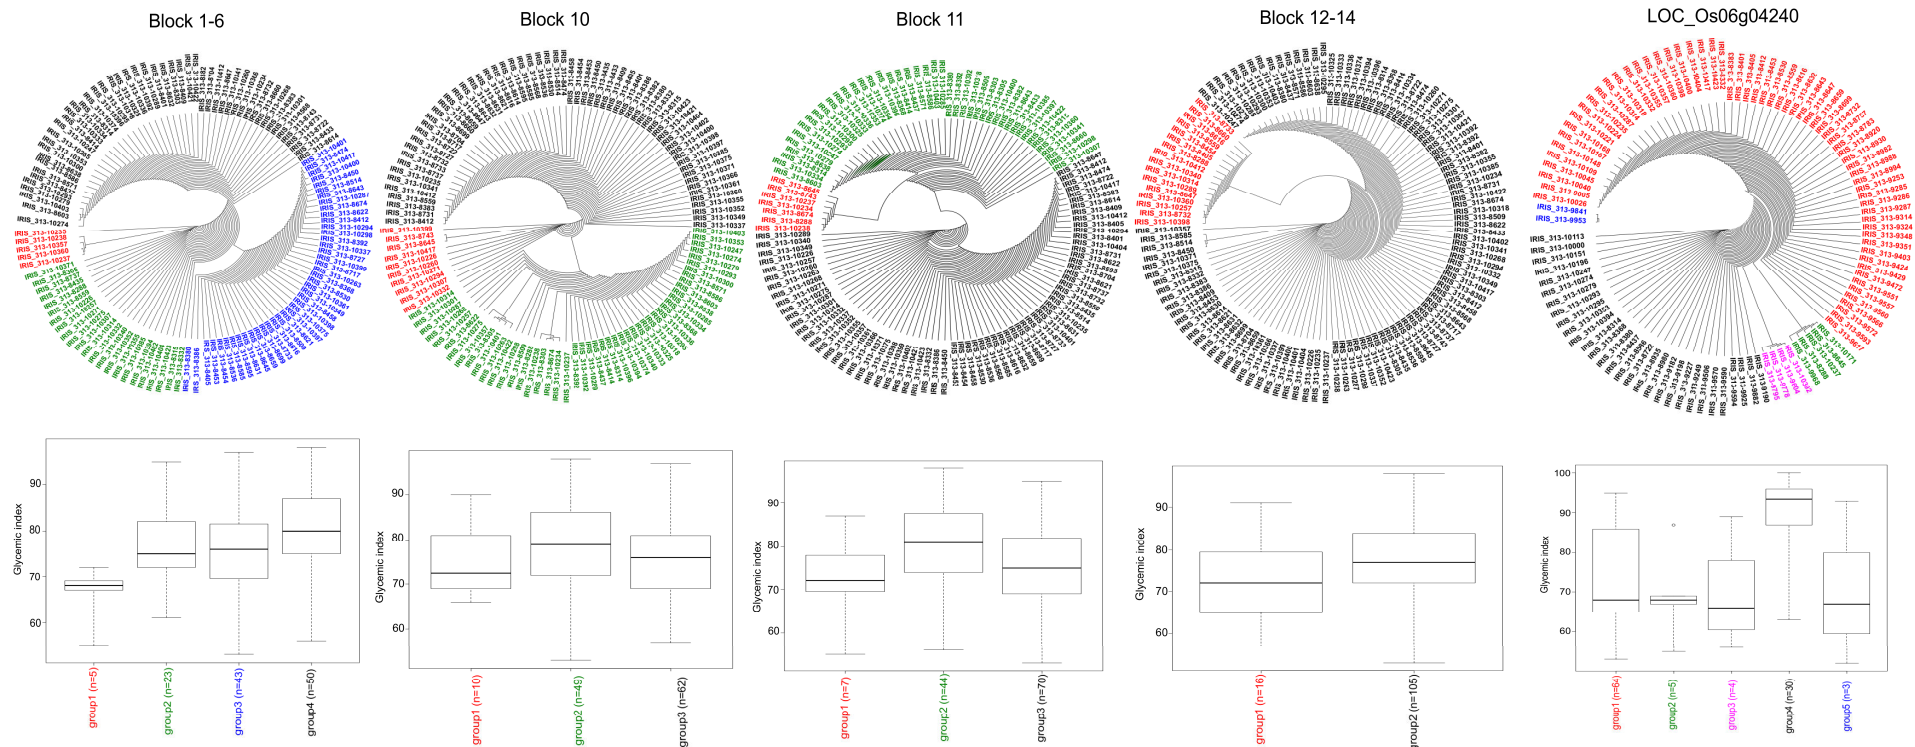

**Figure S3:** Distribution of haplotype groups originating from different LD-blocks within the GI6.1 region. The dendrograms and boxplots of different groups were constructed based on the significant SNPs from LD-block 1 to 6 (a), block 10 (b), block 11(c), block 12 to 14 (d) and candidate LOC\_Os06g04240 (e). Haplotypes in the boxplots were represented on the basis of influence of respective haplotype on the GI values. Number of the accessions bearing the haplotype groups are mentioned in parentheses.

Figure S4

Chromosome 6

a

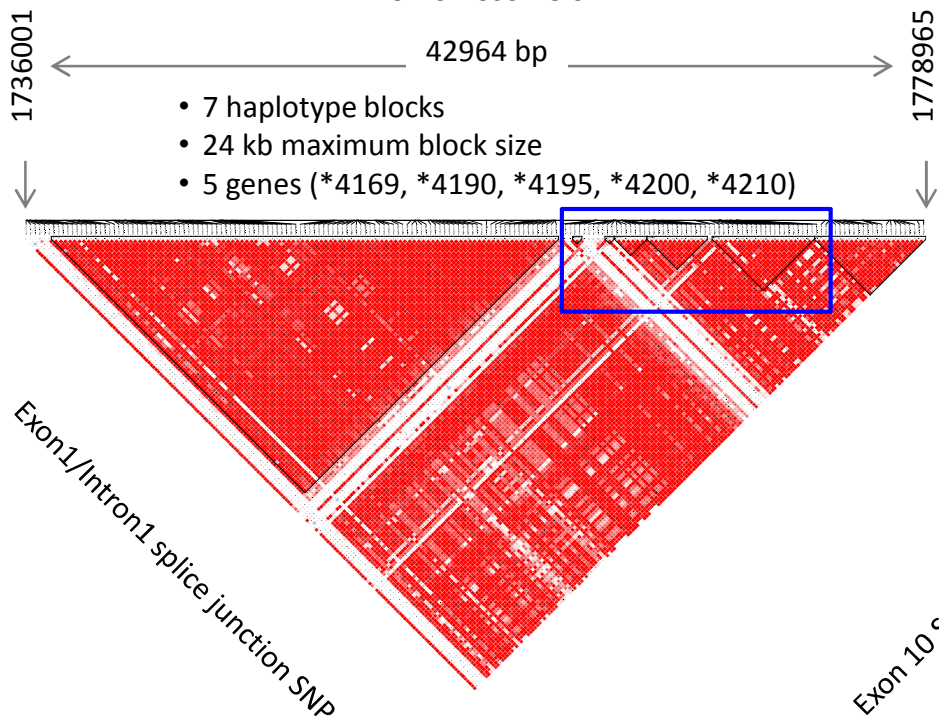

b

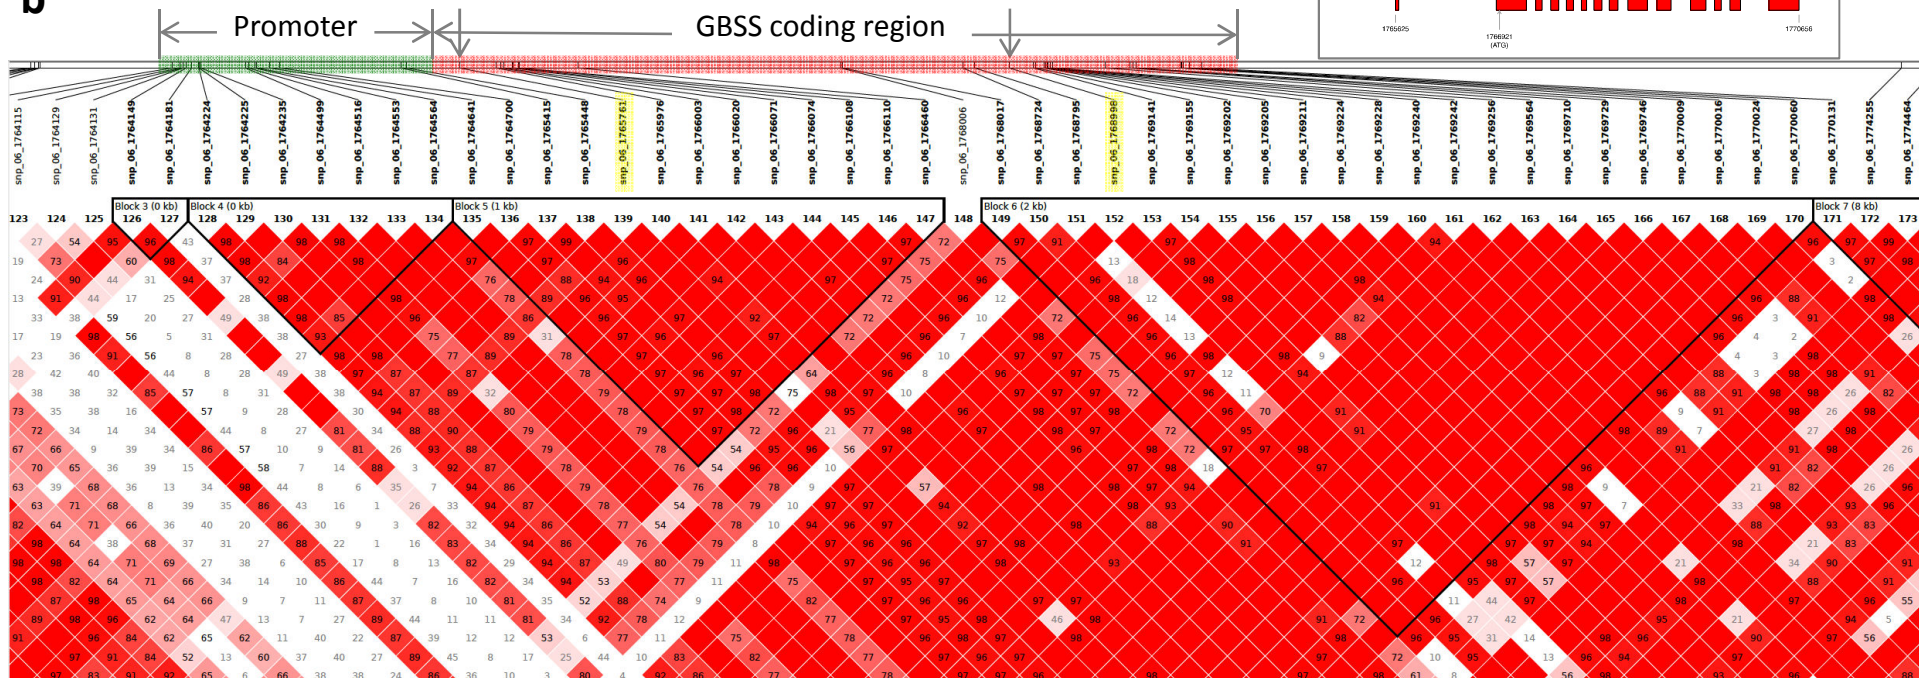

c

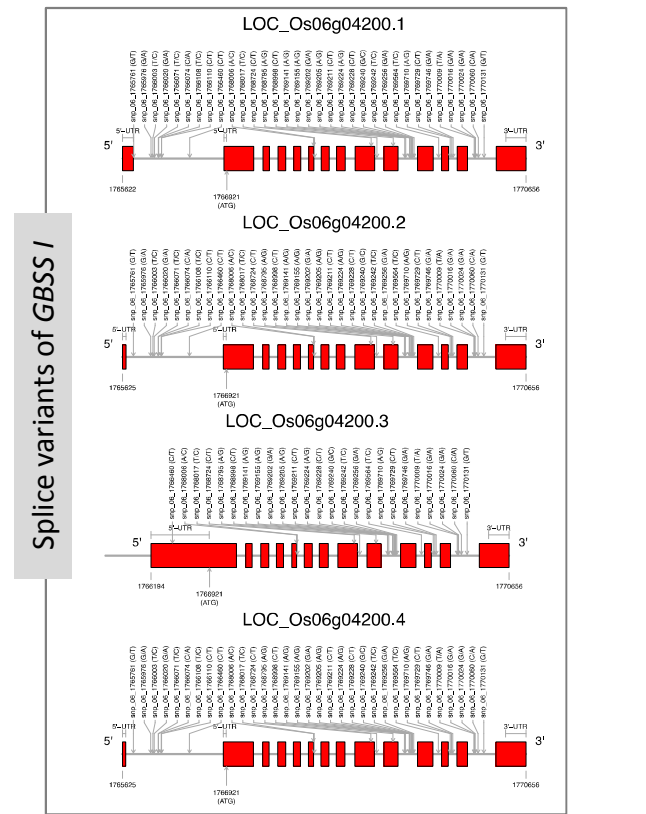

**Figure S4.** Linkage disequilibrium involving the *granule-based starch synthase I (GBSS I)* and neighboring genes. **(a)** Calculation of haplotype blocks using Haploview 4.2 within the region Chr6:1736001-1778965 calculated using Gabriel’s algorithm implemented in the software with 95% confidence interval on  $D'$ , and minimum minor allele frequency of 0.05. Only significant SNPs were considered and the five genes where these SNPs were found. The limits were chosen purposely to include the LOC\_Os06g04169 (encoding transmembrane glycosyl hydrolase), *GBSS I*, and the gene immediately downstream to visualize the linkage disequilibrium between these genes. The \* is an abbreviation of “LOC\_Os06g0”. **(b)** The detailed view of the region marked by a blue box in (a) that corresponds to *GBSS I*. The chromosome segment marked by green represents the promoter region of *GBSS I* 1 kb upstream of the transcription start site. The chromosome segment marked by red represents the coding region of *GBSS I*. The locations where the splice junction SNP and the exon 10 SNP were located were marked by arrows in their corresponding haplotype blocks. **(c)** The gene structure of the four splice variants of the *GBSS I* showing the complete set of available genic SNPs.

Figure S5

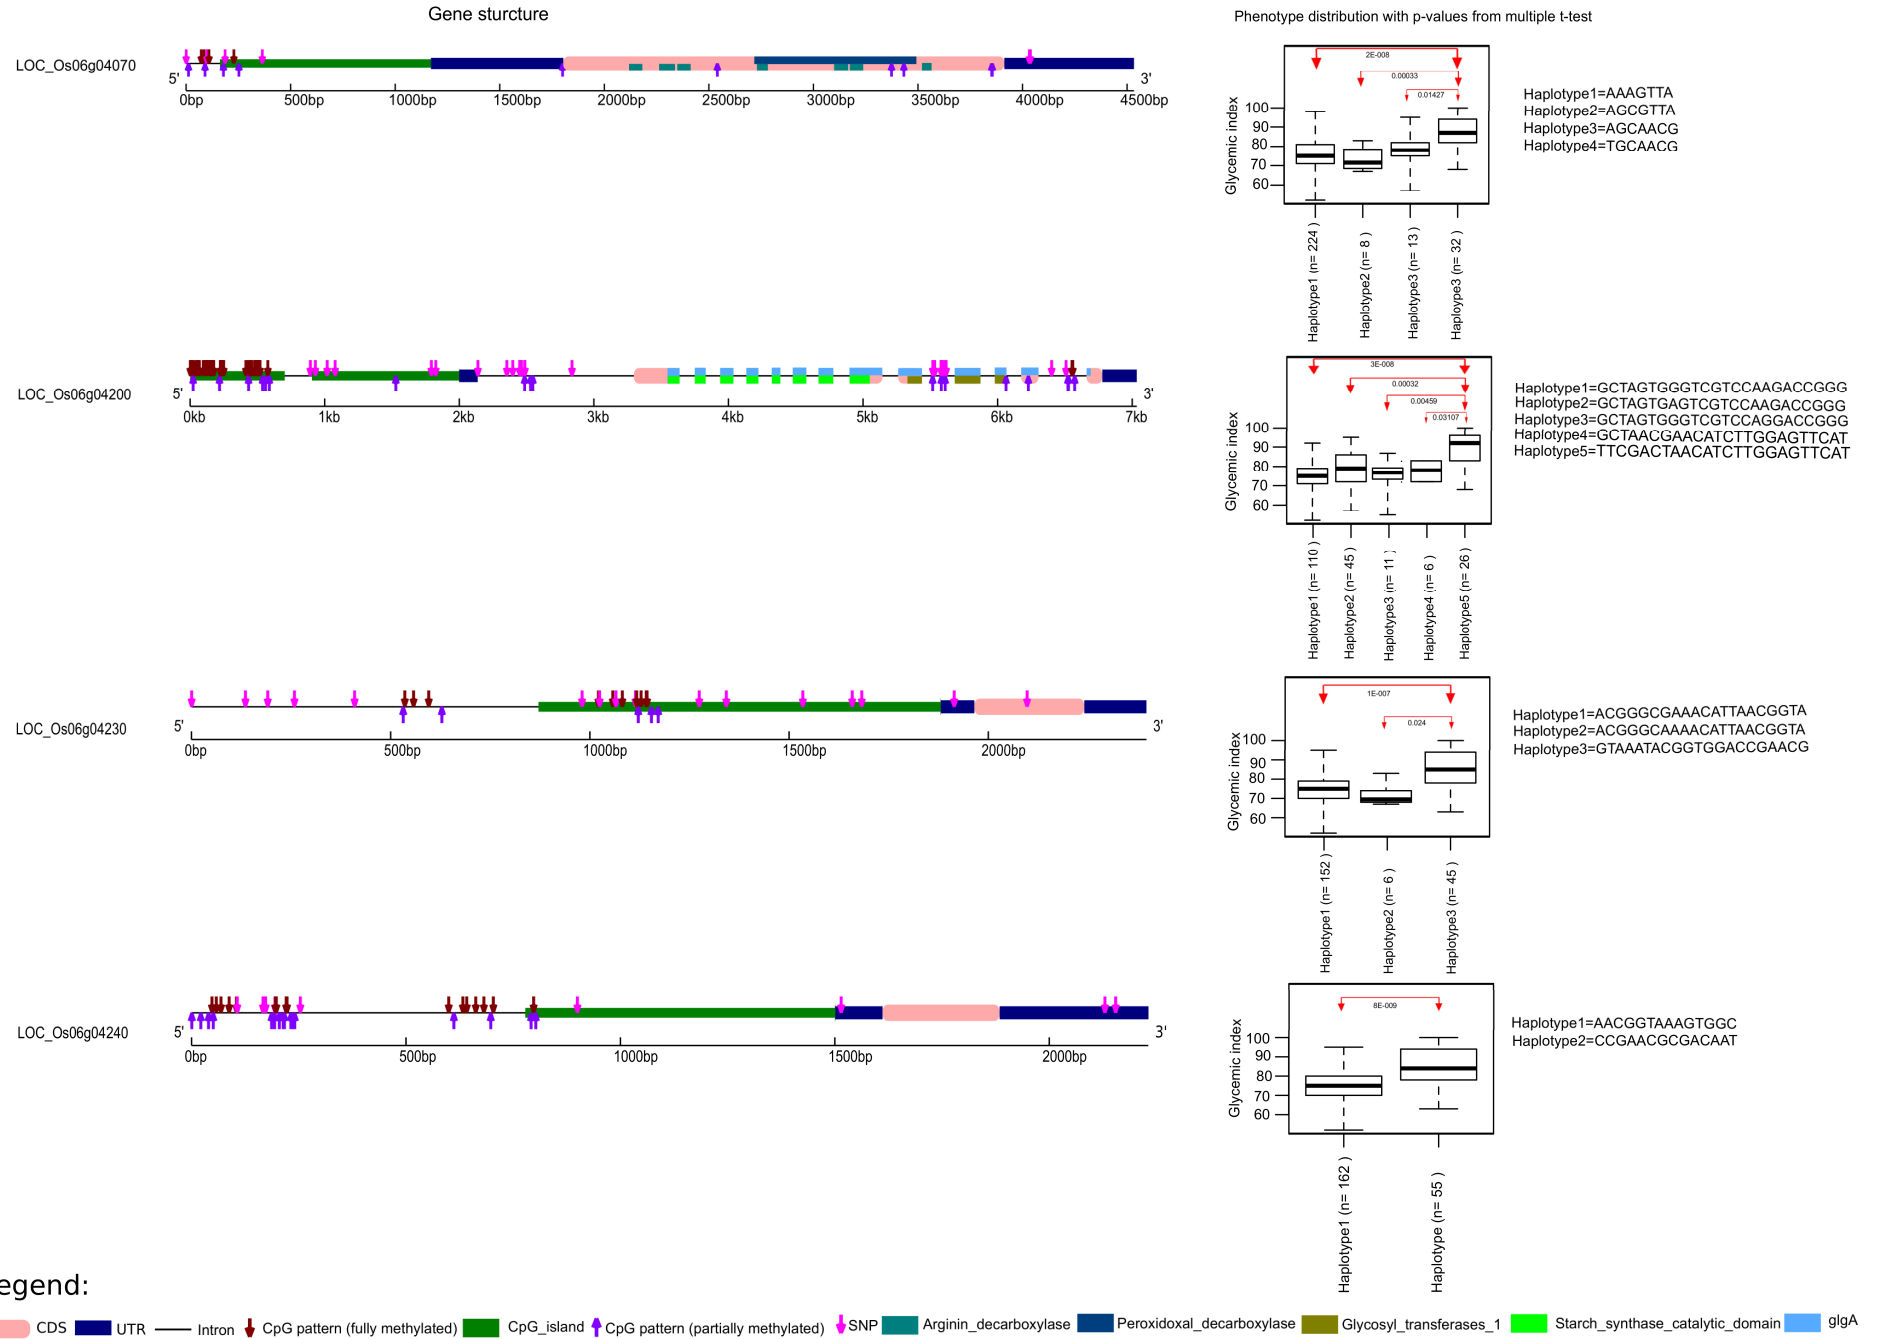

**Figure S5:** Gene structure model with distribution of SNP and methylation pattern in the candidates identified through targeted gene association study. The distribution of CpG pattern including fully methylation (downward brown arrow) and partially methylation (upward blue arrow) in the genic region of four candidates LOC\_Os06g04070, LOC\_Os06g04200, LOC\_Os06g04230 and LOC\_Os06g04240 along with SNP distribution (downward pink arrow) identified from GWAS contributing to distinguish GI phenotypes are presented. Rest of the color coding showed in the gene structure model is shown as footer of the figure. On the right hand side, haplotypes constructed from the respective set of SNPs were represented in the boxplot with their effect on the GI value (representing lines are mentioned in the parentheses). In boxplots, haplotypes showing their significance over other haplotype(s) (at the significance level of  $P \leq 0.05$  using pair wise t-test) were marked in red arrows.

Figure S6

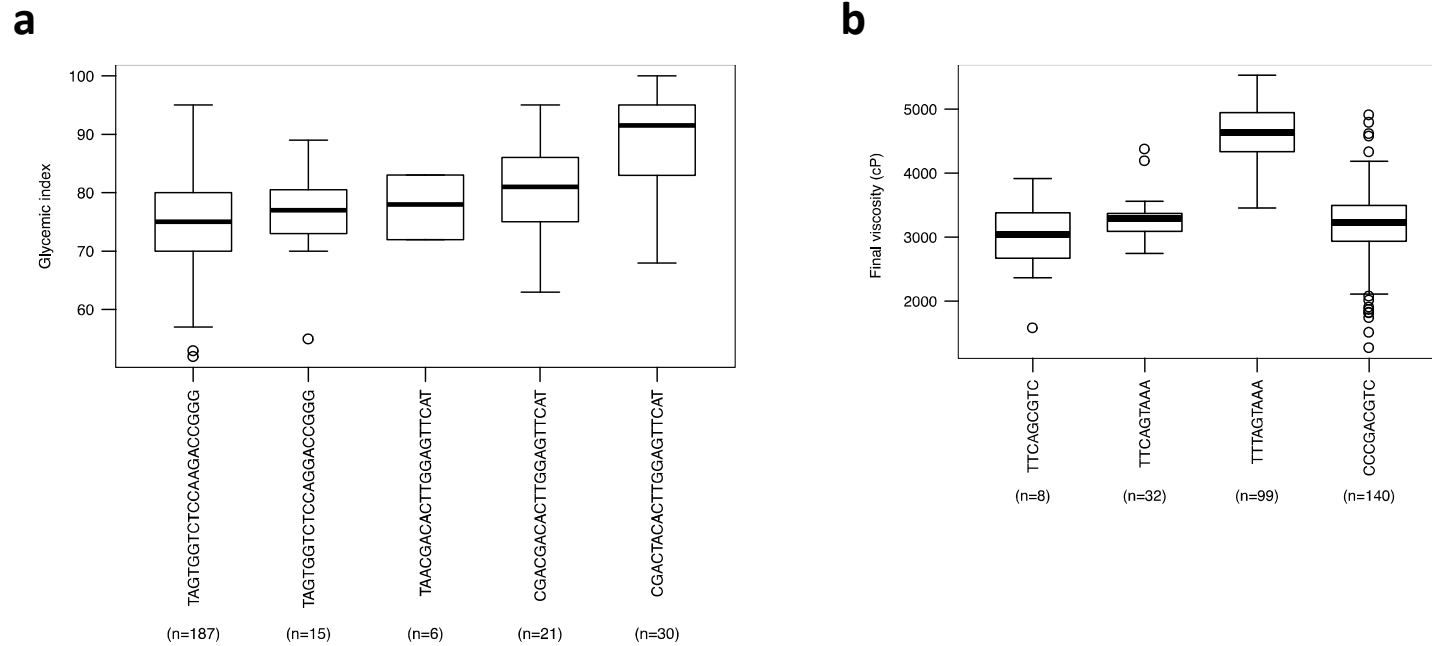

**Figure S6** Phenotypic variation explained by haplotypes formed by significant SNPs in *granule bound starch synthase 1* (*GBSS 1*). **(a)** A total of 20 significant SNPs in the promoter (-1 kb) and genic regions of *GBSS 1* (see **Fig. 3a**) explaining phenotypic variation of glycaemic index (GI). **(b)** Variation in final viscosity (FV) explained by nine SNPs in *GBSS 1* that have  $p < 1e-20$  (see **Fig. 3a**).





**Figure S8**

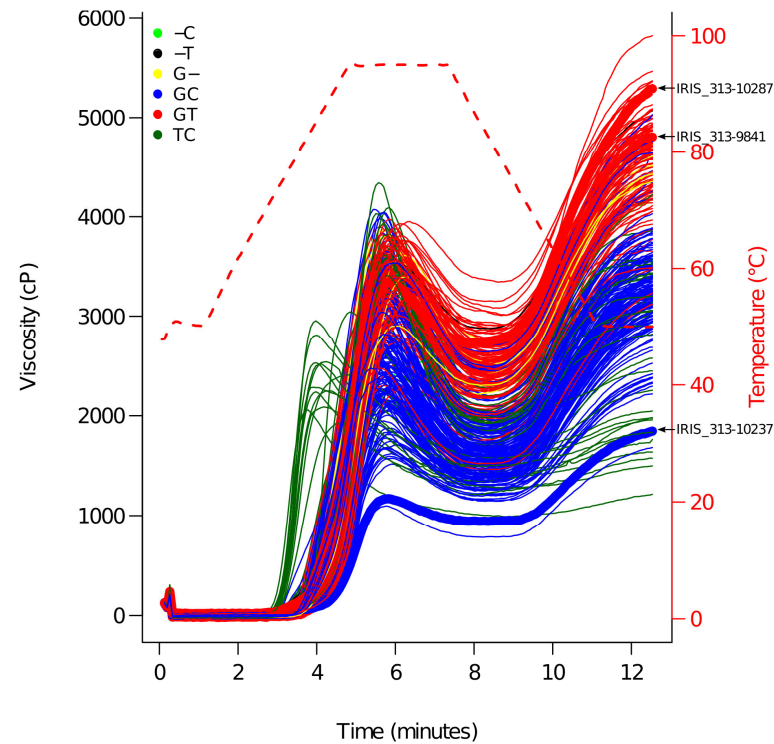

**Figure S8** : Plots of the rapid viscosity analyzer (RVA) profiles of the diversity panel. In the RVA-plot, colored curves represent the GT (red), GC (blue) and TC (green) haplotypes (color legend mentioned at upper right corner of the figure). Light green, black and yellow curves represent those with missing genotype calls in either of the two represented SNPs. The red dotted line as per the secondary Y-axis, represents the temperature variation throughout the entire RVA run. Plot for three low GI accessions were highlighted as thicker (with higher weight) curves, while colored based on their presence of the haplotype group.

Figure S9

**a**

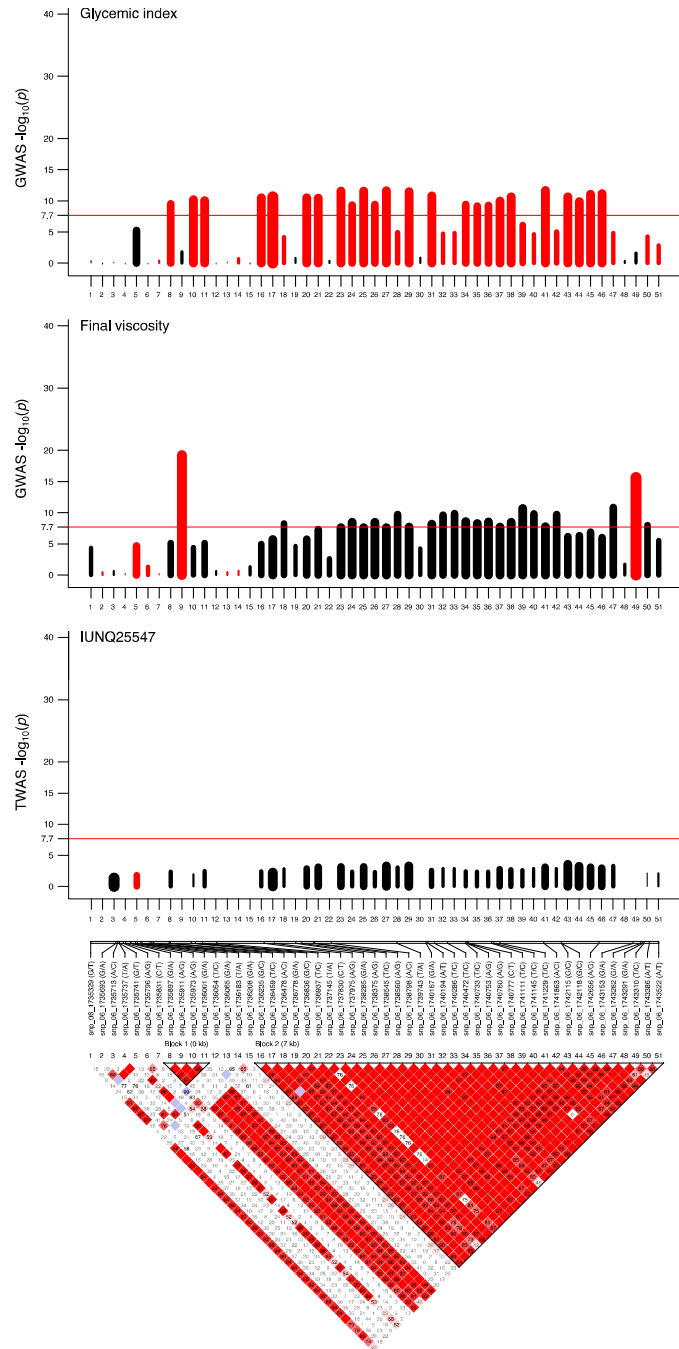

**b**

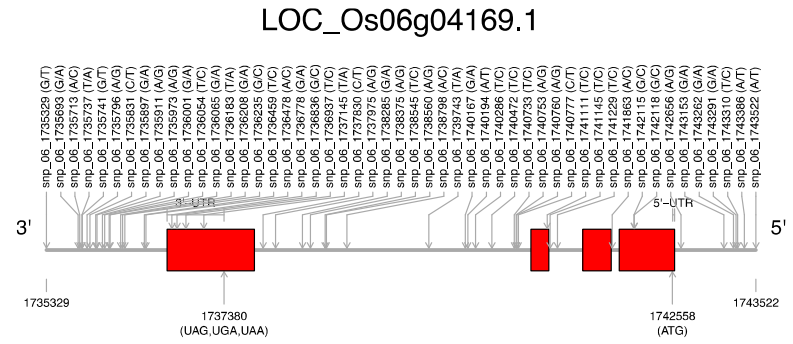

**c**

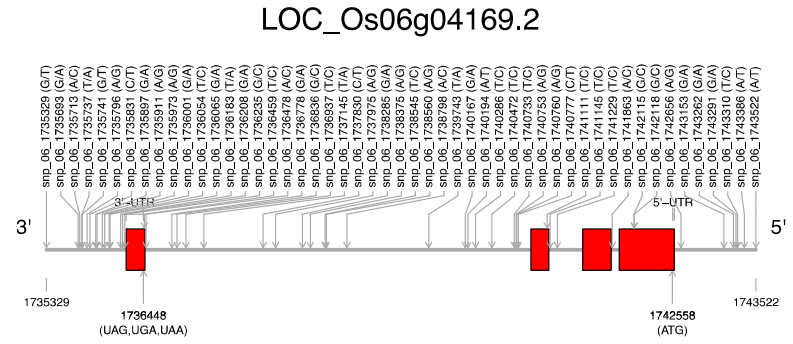

**Figure S9** Summary for SNPs that are within the promoter and (-1 kb) promoter region of a gene encoding transmembrane glycosyl hydrolase (LOC\_Os06g04169). **(a)** The topmost track shows the  $-\log_{10}$  plot of the association  $p$ -values for glycemic index (GI). A red bar indicates that the effect allele of the SNP causes a decrease in GI while a black bar is the opposite. Bar thickness is reflective of the relative effect size of the effect allele compared to the rest of the SNPs in the gene. Below the topmost track is the  $-\log_{10}$  plot of the association  $p$ -values for final viscosity (FV). The color and thickness of the bars are as previously described. The third track is the  $-\log_{10}$  plot of the  $p$ -values of the *cis*-eQTL analysis done on the expression of the gene. The color and thickness of the bars are as previously described. The bottom track that shows SNP IDs with their alleles, the placement of the SNPs on the chromosome segment, and the haplotype blocks calculated using Gabriel's algorithm implemented in Haploview 4.2. **(b)-(c)** Represent the two alternative forms of the gene due to alternative splicing. The orientation of the strand indicates that this gene was annotated in the reverse strand.

**Figure S10**

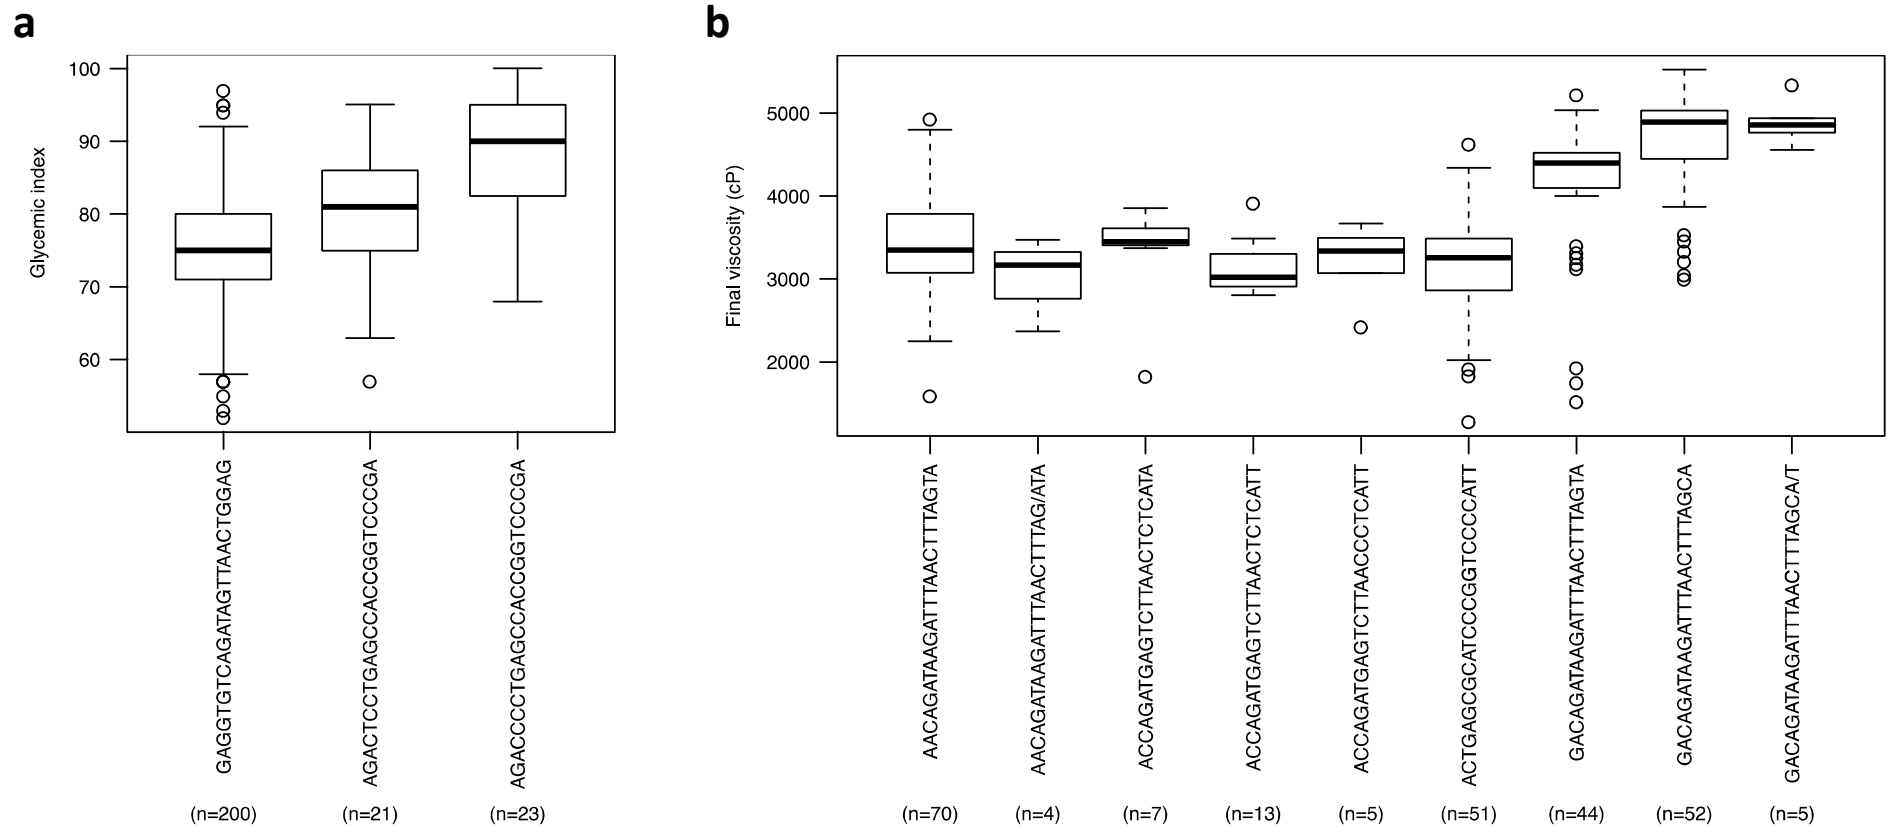

**Figure S10** Phenotypic variation explained by haplotypes formed by significant SNPs in a gene encoding transmembrane glycosyl hydrolase (LOC\_Os06g04169). **(a)** A total of 24 significant SNPs in the promoter (-1 kb) and genic regions of the gene (see **Figure S9a**) explaining phenotypic variation of glycemic index (GI). **(b)** Variation in final viscosity (FV) explained by the same SNPs (see **Figure S9a**).

Figure S11

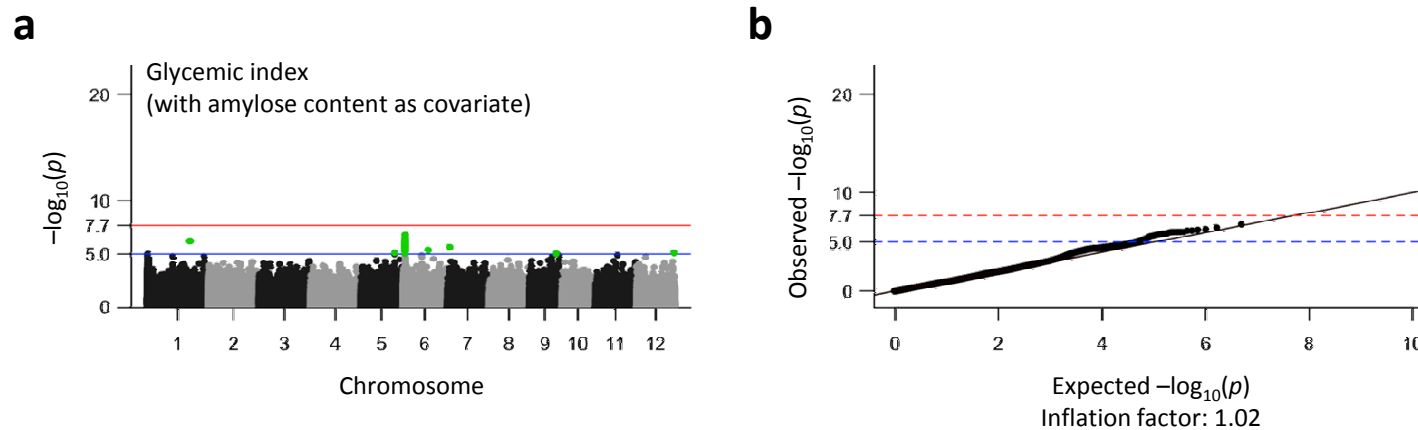

**Figure S11** Genome-wide association study for glycemic index with amylose content as covariate. (a) Manhattan plot where the association significance threshold for the  $-\log_{10}$  of the association  $p$ -values was at 7.7 after Bonferroni correction. The green dots indicate those SNPs with  $p < 1.0e-5$ , which were within  $q$ -value significance (false discovery rate). (b) Quantile-quantile plot for the GWAS with inflation factor  $\lambda=1.02$ .

Figure S12

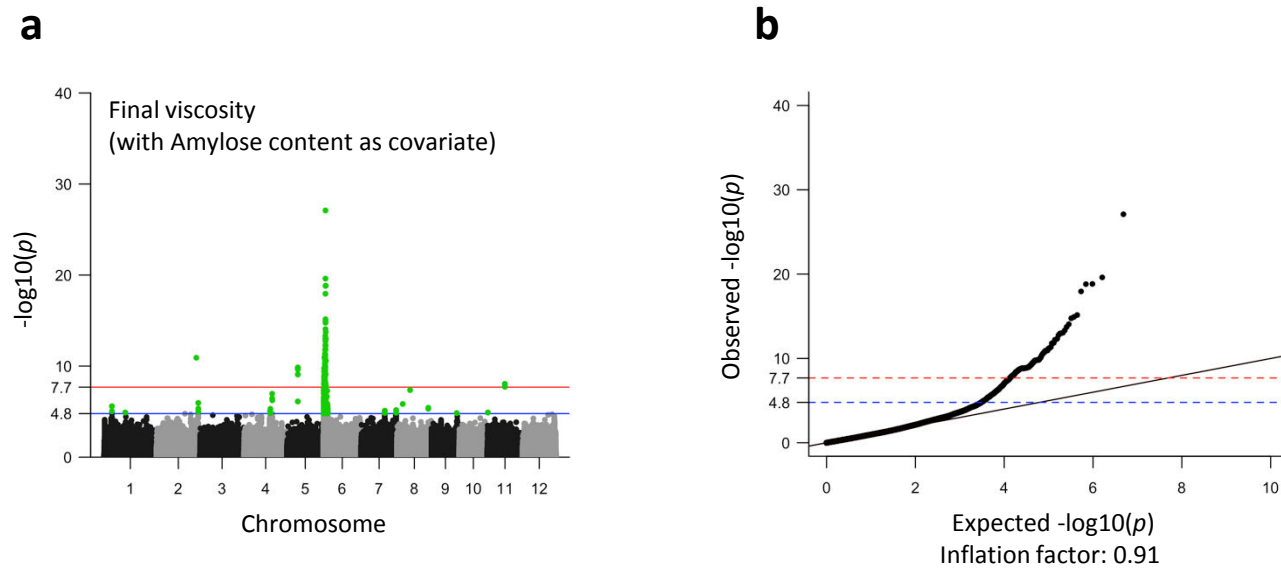

**Figure S12** Genome-wide association study for final viscosity (FV) with amylose content (AC) as covariate. **(a)** Manhattan plot shows significant association signals in chromosomes 2, 5, 6, and 11 indicated by the red line at  $-\log_{10}(p)=7.7$  that represents the Bonferroni-corrected  $p$ -value significance threshold. The blue line at  $-\log_{10}(p)=4.8$  is the suggestive line represented by the association  $p$ -value that corresponds to the  $q$ -value $<0.5$  (false discovery rate). **(b)** Quantile-quantile plot where the inflation factor  $\lambda=0.91$ .

Figure S13

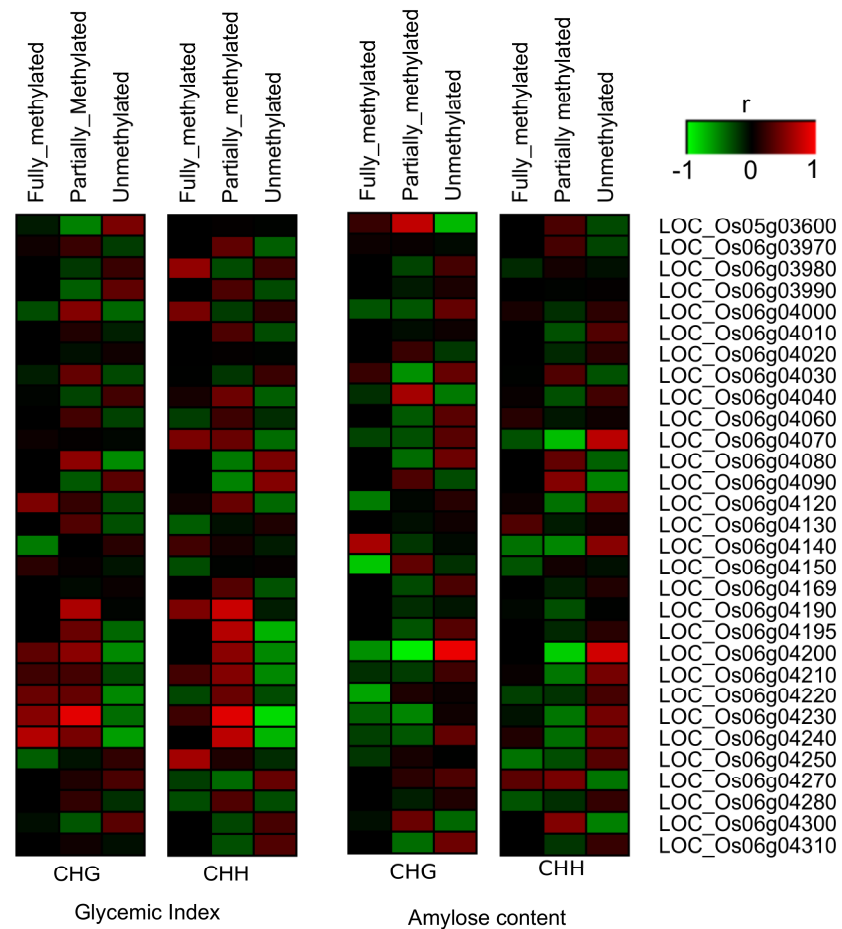

**Figure S13:** Correlation of GI and AC with the level of methylation existing in the genic region of the genes underlying *Gl6.1* hotspot region, in the ten resequenced lines. **(a)** Effect of degree of methylation (CHH and CHG context) in the genic regions of the candidates in *Gl6.1* region, on phenotype of GI and % amylose content in the ten resequenced lines. Fully methylated region depicted >90% methylated region, whereas, partially methylated region symbolizes the 10-90% of methylation in the region. Correlation coefficients ranged from -1 (green) to +1 (red).



Figure S14

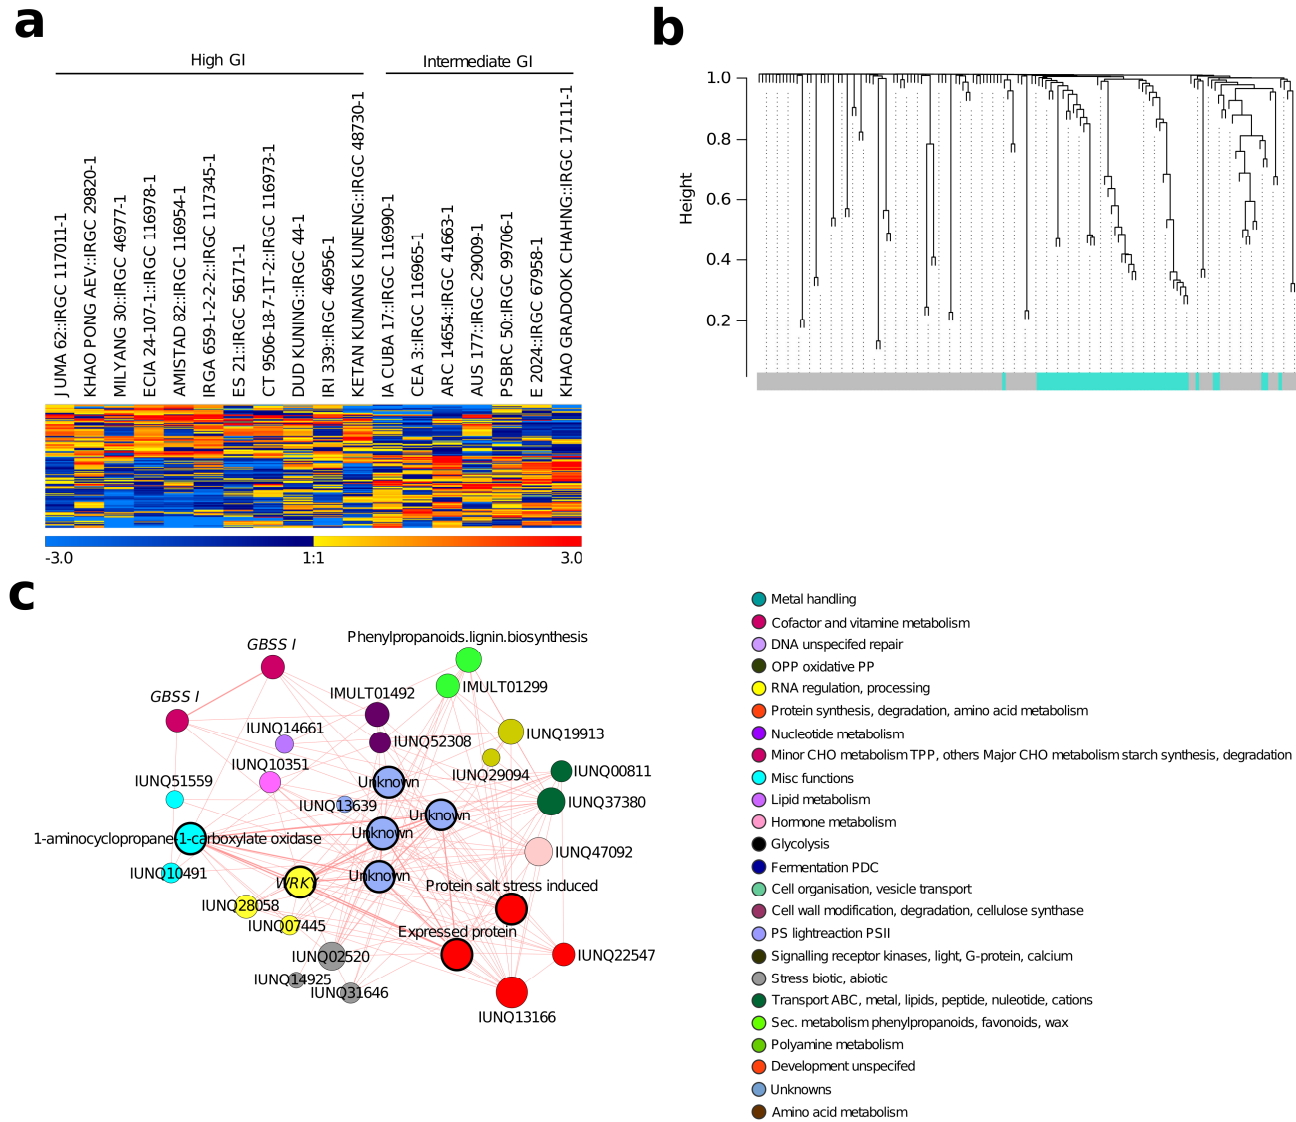

Figure S14: Weighted gene co-expression analysis among high and intermediate GI lines. (a) heat map of differentially expressed genes between the high vs intermediate lines (Heat map scale ranges from min -3 to max +3 normalized expression values which are shown as blue to red color gradient representing the low and high expression, respectively). (b) Gene dendrogram with the turquoise clustered module in high vs intermediate. (c) Gene co-expression subnetwork of the turquoise module in high vs intermediate. Nodes in each network represent the gene and edges as the interaction, the variation of node size shows the different degree of connectivity and bordered wall nodes represents the hub. Functional categories based on the MapMan ontology term are shown in different colored nodes in the network.

Figure S15

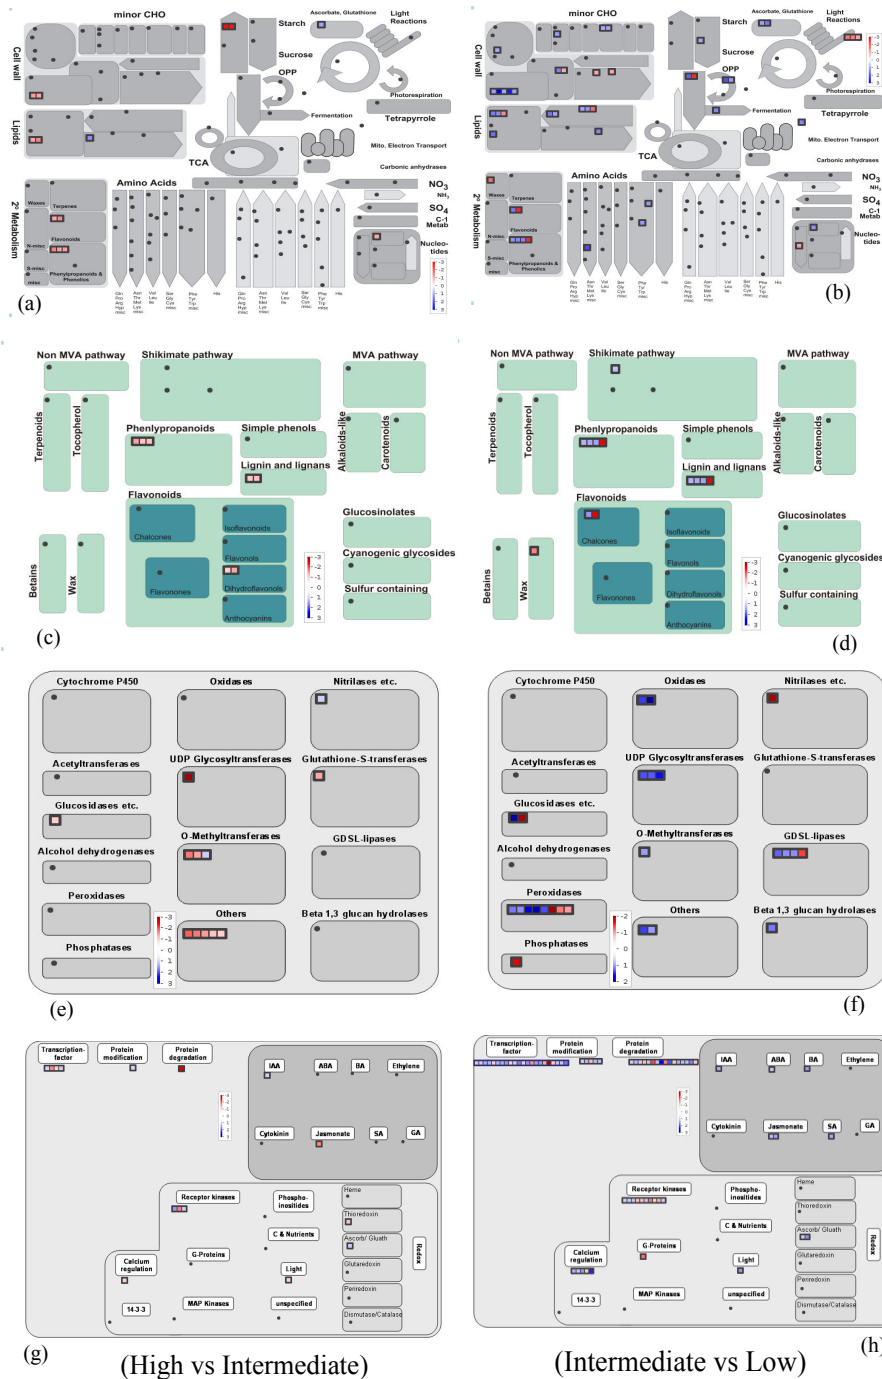

Figure S15 Overview of gene expression profile by MapMan. (a, b) metabolic response; (c, d) secondary metabolism; (e, f) enzyme families; (g, h) regulation overview by MapMan between high versus intermediate and intermediate versus low, respectively. (logFC±3, Blue color represents high expression, while red represents low).
